1           **Developmental evidence for parental conflict in driving *Mimulus* species barriers**  
2  
3  
4  
5  
6

7 Gabrielle D. Sandstedt and Andrea L. Sweigart  
8

9 Department of Genetics, University of Georgia, Athens GA, 30602, USA.  
10  
11  
12  
13  
14  
15  
16  
17

18 **Corresponding author:**

19 Gabrielle D. Sandstedt

20 120 E. Green St.

21 Athens, GA 30602

22 [gsandste@gmail.com](mailto:gsandste@gmail.com)  
23  
24  
25  
26  
27  
28  
29  
30  
31

32  
33  
34  
35  
36  
37  
38  
39  
40  
41  
42  
43  
44  
45  
46  
47  
48

## ABSTRACT

The endosperm, a tissue that nourishes the embryo in the seeds of flowering plants, is often disrupted in inviable hybrid seeds between species presumed to have divergent histories of parental conflict. Despite the potential importance of parental conflict in plant speciation, we lack direct evidence of its action in driving species barriers. Here, we performed reciprocal crosses between pairs of three monkeyflower species (*Mimulus caespitosa*, *M. tilingii*, and *M. guttatus*). The severity of hybrid seed inviability varies among these crosses, which we determined was due to species divergence in effective ploidy. By performing a time series of seed development, we assessed whether regions within the endosperm were potential targets of parental conflict. We found that the chalazal haustorium, a tissue within the endosperm that occurs at the maternal-filial boundary, develops abnormally in hybrid seeds when the paternal parent has the greater effective ploidy. Within these *Mimulus* species, parental conflict might target the chalazal haustorium to control sucrose movement from the maternal parent into the endosperm. Consequently, conflict may be exposed in crosses between species. Our study suggests that parental conflict in the endosperm may function as a driver of speciation by targeting regions and developmental stages critical for resource allocation.

49  
50  
51

KEY WORDS: chalazal, endosperm, hybrid seed inviability, *Mimulus*, parental conflict, speciation

52  
53  
54

## INTRODUCTION

55  
56  
57  
58  
59  
60  
61  
62

Identifying the evolutionary drivers of reproductive isolation is critical for understanding the origin of species. This task has been a challenge for intrinsic postzygotic isolation, which arises when hybrids inherit novel combinations of incompatible alleles that cause inviability or sterility (Dobzhansky, 1937; Muller, 1942). Because these incompatible combinations occur uniquely in hybrids and are independent of the environment, there are usually few clues as to why the causal alleles initially increase in frequency and fix within species. In flowering plants, hybrid seed inviability is a common form of postzygotic isolation in which crosses between

63 closely related species produce only flattened, shriveled seeds that fail to germinate (Rebernick *et*  
64 *al.*, 2015; Oneal *et al.*, 2016; Lafon-Placette *et al.*, 2017; Roth *et al.*, 2018; Coughlan *et al.*,  
65 2020; İltaş *et al.*, 2021). Almost invariably, this inviable seed phenotype involves defects in the  
66 endosperm (Lafon-Placette & Köhler, 2016), a nutritive tissue that surrounds and feeds the  
67 developing embryo. The endosperm is one of two products formed through double fertilization, a  
68 key reproductive feature of flowering plants. During this process, one of the haploid pollen  
69 sperm cells fuses with the haploid egg cell to form a diploid zygote, while the other fuses with  
70 the homodiploid central cell to form a triploid endosperm with a relative contribution of two  
71 maternal to one paternal (2m:1p) genomes (Berger, 2003; Berger *et al.*, 2008). Given its major  
72 role in postzygotic isolation, discovering how the endosperm evolves within and between closely  
73 related lineages holds great promise for probing the evolutionary mechanisms of plant  
74 speciation.

75  
76 The first hints that endosperm evolution might drive reproductive barriers came from  
77 early crossing studies that showed high rates of seed failure between plants of different ploidies.  
78 Many of these studies also reported pronounced reciprocal differences in seed growth and  
79 development (Håkasson, 1952; Woodell & Valentine, 1961; Nishiyama & Inomata, 1966). In  
80 general, they found that crosses with “maternal excess” – that is, crosses with the higher ploidy  
81 plant as the maternal parent – produce smaller seeds than intraploidy crosses that are sometimes  
82 inviable. In contrast, “paternal excess” crosses – those with the higher ploidy plant as the pollen  
83 donor – generally produce larger seeds, which often abort (Scott *et al.*, 1998; Pennington *et al.*,  
84 2008; Lu *et al.*, 2012). These observations led to the hypothesis that seed failure is caused by a  
85 deviation from the usual dosage of 2m:1p genomes in the triploid endosperm (Johnson *et al.*,  
86 1980; Lin, 1984; Haig & Westoby, 1989). However, because these same parent-of-origin effects  
87 were also discovered in interspecific crosses of the same ploidy (Cooper & Brink, 1942;  
88 Stephens, 1949; Nishiyama & Yabuno, 1978), it became clear that disruptions to the 2m:1p ratio  
89 can also arise through allelic divergence. Thus, cross compatibility was said to be a function of  
90 “effective” ploidy, rather than of absolute genome number (Johnston *et al.*, 1980). In this  
91 conceptualization, plant species with higher effective ploidies have presumably accumulated  
92 genetic variation that mimics the maternal- and paternal-excess effects of higher ploidy plants.  
93 Drawing on many of these same classic crossing studies, Haig & Westoby (1991) recognized

94 that this genetic variation must affect functions specific to maternal and paternal genomes and  
95 proposed genomic imprinting – parent-specific gene expression – as the underlying mechanism.  
96 Indeed, they argued that reciprocal differences in hybrid seed phenotypes between species  
97 diverged in effective ploidy are caused by incompatibilities that disrupt imprinted gene  
98 regulation.

99  
100 In addition to offering a molecular mechanism for parent-of-origin effects and hybrid  
101 seed inviability, Haig & Westoby (1991) proposed the idea that parental conflict is the  
102 evolutionary driver of these phenotypes. Like the mammalian placenta, the angiosperm  
103 endosperm plays a critical role in the acquisition and transfer of nutrients to the embryo (Brink &  
104 Cooper, 1947). In plant species that receive pollen from more than one donor, the endosperm is  
105 predicted to operate as a venue for parental conflict with maternal and paternal genomes  
106 evolving different levels of resource acquisition due to their unequal relatedness to offspring  
107 (Hamilton, 1964; Haig & Westoby, 1989; Brandvain & Haig, 2005). In a maternal (seed) parent,  
108 natural selection should favor gene expression in the endosperm that equalizes nutrient  
109 acquisition among all seeds, whereas in a paternal parent (pollen donor), selection should favor  
110 gene expression that maximizes resource acquisition in its own offspring at the expense of  
111 unrelated seeds (Haig & Westoby, 1989). At a mechanistic level, this scenario is thought to play  
112 out through epigenetic modifications during male and female gametogenesis that regulate parent-  
113 of-origin biased gene expression in the endosperm (i.e., genomic imprinting; Reik & Walter,  
114 2001; Haig & Westoby, 1991; Kinoshita, 2007; Batista & Köhler, 2020). Within a population,  
115 endosperm “balance” should be maintained through coevolution between loci that act to acquire  
116 resources from the seed parent and loci that moderate these acquisitive effects; however, species  
117 barriers may arise in hybrid genomes formed from species with divergent histories of parental  
118 conflict (Haig & Westoby, 1991). Despite the intuitive appeal of this theory, direct evidence for  
119 parental conflict in shaping endosperm development and driving barriers between closely related  
120 species is fairly limited (but see Coughlan *et al.*, 2020). Moreover, because hybrid seed  
121 inviability has rarely been investigated in a phylogenetic context, we have little understanding of  
122 its evolutionary tempo. For example, it is not yet clear how often changes in effective ploidy are  
123 tied to shifts in mating system, as might be expected if the evolution of self-fertilization

124 alleviates parental conflict (Brandvain & Haig, 2005), or whether these changes accumulate with  
125 genetic distance.

126  
127         According to the predictions of parental conflict theory, selection in the endosperm  
128 should target developmental timepoints or functions that are most important for nutrient uptake  
129 (Queller, 1983). Most of what is known about the developmental phenotypes associated with  
130 hybrid seed inviability comes from crosses in *Arabidopsis* and other systems with nuclear-type  
131 endosperms (so called because the early endosperm forms a syncytium; Bushell *et al.*, 2003;  
132 Rebernik *et al.*, 2015; Floyd & Friedman, 2000), where the timing of cellularization seems to be  
133 a major determinant of nutrient acquisition and seed size (Garcia *et al.*, 2003; Luo *et al.*, 2005;  
134 Kang *et al.*, 2008; Hehenberger *et al.*, 2012). In interploidy crosses in these systems, endosperm  
135 cellularization is often precocious when the seed parent has higher ploidy and delayed when the  
136 pollen parent has higher ploidy, resulting in smaller or larger seeds, respectively (Scott *et al.*,  
137 1998; Pennington *et al.*, 2008; Lu *et al.*, 2012; Morgan *et al.*, 2021). The fact that these same  
138 maternal- and paternal-excess effects on cellularization have been observed in crosses between  
139 species of the same ploidy in *Arabidopsis* and *Capsella* (Lafon-Placette *et al.*, 2017; Rebernik *et al.*  
140 *et al.*, 2015; Lafon-Placette *et al.*, 2018) has been taken as evidence for parental conflict in nuclear-  
141 type endosperms. Although these disruptions in developmental timing are certainly suggestive,  
142 few studies of hybrid seed inviability have explicitly investigated resource provisioning  
143 functions in distinct regions of the endosperm – especially in systems with non-nuclear modes of  
144 endosperm development (i.e., cellular and helobial). In most angiosperms, the endosperm is not a  
145 homogeneous structure but rather differentiates into three spatially and functionally distinct  
146 domains: the micropylar domain that surrounds the embryo, the chalazal domain that occurs at  
147 maternal–filial interface, and the central peripheral domain that makes up the largest portion of  
148 the endosperm (Brown *et al.*, 2003). Of these domains, the micropylar and chalazal regions  
149 appear to be directly involved in nutrient transfer from maternal to filial structures (Baud *et al.*,  
150 2005, Morley-Smith *et al.*, 2008), making them potential targets of parental conflict and centers  
151 for the evolution of reproductive barriers.

152  
153         Across the wildflower genus *Mimulus*, hybrid seed inviability has evolved repeatedly  
154 (Vickery, 1978; Oneal *et al.*, 2016; Garner *et al.*, 2016; Coughlan *et al.*, 2020; Kinser *et al.*,

2021; Sandstedt *et al.*, 2021), making it an outstanding system for dissecting the developmental and evolutionary mechanisms of this common isolating barrier. In *Mimulus*, the endosperm is of the cellular-type, meaning that cell walls develop following the initial division of the primary endosperm nucleus (Arekal, 1965; Guilford & Fisk, 1952; Oneal *et al.*, 2016). After a few rounds of cell division, the three major endosperm domains form (i.e., micropylar, chalazal, and central-peripheral endosperm), with the micropylar and chalazal regions giving rise to separate haustoria that likely act as channels for nutrient transfer between the maternal plant and developing seed (Nguyen *et al.*, 2000; Mikesell, 1990). The chalazal haustorium is ephemeral, composed of two cells extending from the ovule toward the micropylar domain that typically degenerates when the embryo is near a globular stage (Arekal, 1965; Guilford & Fisk, 1952; Oneal *et al.*, 2016). On the opposite end of the seed, the two cells of the micropylar haustorium appear to penetrate the integuments (i.e., precursors of the seed coat) and degenerate when the embryo is nearly fully developed (Arekal, 1965). Given their invasion of neighboring tissues to funnel nutrients to the developing embryo, we might expect defects in the haustoria of hybrid seeds if *Mimulus* species have diverged in their levels of parental conflict. Such phenotypes have been noted before in chalazal structures of interploidy crosses in *A. thaliana* (Scott *et al.*, 1998), but they have not been described in a conflict scenario between species of the same ploidy.

In this study, we investigate the developmental phenotypes associated with hybrid seed inviability among three closely related, diploid *Mimulus* species with a nested pattern of relatedness: *M. caespitosa* and *M. tilingii* shared a common ancestor ~382 kya, and *M. guttatus* diverged from the other two ~674 kya (Sandstedt *et al.*, 2021). Populations of *M. caespitosa* and *M. tilingii* occur exclusively at high elevations and appear to be mostly allopatric, with *M. caespitosa* restricted to Washington state and *M. tilingii* mostly known from alpine areas of Oregon and California. *M. guttatus* occupies a more diverse range in western North America, sometimes overlapping with populations of *M. caespitosa* and *M. tilingii* (Nesom, 2012; Coughlan *et al.*, 2021). Previously, we showed that crosses between *M. caespitosa* and *M. tilingii* result in severe hybrid seed inviability – but only when *M. tilingii* is the paternal parent (crosses in the reciprocal direction produce mostly viable seeds, Sandstedt *et al.*, 2021). Hybrid seed inviability is even stronger between the more distantly related *M. tilingii* and *M. guttatus*, which produce very few (< 1%) viable seeds in either direction of the cross (Vickery, 1978;

186 Garner *et al.*, 2016). Despite this apparent similarity between reciprocal crosses of *M. tilingii* and  
187 *M. guttatus*, most of the underlying genetic loci affect seed viability only through the maternal or  
188 paternal parent (Garner *et al.*, 2016). These parent-of-origin effects on seed viability and genetic  
189 loci strongly point to a role for the endosperm, but its involvement has not yet been directly  
190 tested.

191  
192 Here, we leverage this closely related trio of *Mimulus* species to investigate whether  
193 parental conflict is an important driver of hybrid seed inviability. First, we explore the severity of  
194 hybrid seed inviability in each of the three species pairs and determine whether the endosperm is  
195 involved. Second, we investigate divergence in effective ploidy among the three *Mimulus*  
196 species. For each species pair, we ask whether increasing the ploidy of one species can “balance”  
197 the genetic contribution of the other and rescue hybrid seed inviability. We use this genome  
198 doubling approach to establish hierarchical relationships in effective ploidy among the three  
199 species and determine how it scales with genetic distance. Finally, we investigate the role of  
200 parental conflict in shaping this hierarchy and driving species barriers. We perform detailed  
201 developmental analyses of pure species and hybrid seeds, asking whether developmental  
202 phenotypes linked to resource acquisition appear particularly affected by divergence in effective  
203 ploidy. Together, our results provide strong evidence for parental conflict as a driver of  
204 reproductive isolation in this group of *Mimulus* species.

205

206

207

## MATERIALS AND METHODS

208

### ***Generation of Plant Material***

209

210  
211 Here, we used one inbred line (formed from  $\geq 8$  generations of self-fertilization) for each  
212 focal species (*M. caespitosa*, *M. tilingii*, and *M. guttatus*). The same inbred lines were used in  
213 previous studies of hybrid seed inviability in *M. tilingii* and *M. guttatus* (Garner *et al.*, 2016) and  
214 *M. caespitosa* (Sandstedt *et al.*, 2021). The *M. caespitosa* inbred line, TWN36, originates from a  
215 high-alpine population at 1594m in Twin Lakes, WA. The *M. tilingii* inbred line, LVR1, is

216 derived from a population at 2751m in Yosemite Park, CA. The *M. guttatus* inbred line, DUN10,  
217 originates from a population in the Oregon Dunes National Recreation Area.

218  
219 In this study, we considered three intraspecific crosses (CxC, TxT, and GxG, where C =  
220 *M. caespitosa*, T = *M. tilingii*, and G = *M. guttatus*) and six interspecific crosses (CxT, TxC,  
221 TxG, GxT, CxG, GxC; maternal parent is always listed first). To generate diploid, experimental  
222 plants, we sowed 20-30 seeds for each inbred line on damp paper towels in petri dishes sealed  
223 with parafilm and cold-stratified them for 7 days to disrupt seed dormancy. After cold  
224 stratification, we transferred petri dishes to a growth chamber with 16-h days at 23°C and 8-h  
225 nights at 16°C. We transplanted seedlings into 3.5” pots with moist Fafard 4P growing mix (Sun  
226 Gro Horticulture, Agawam, MA) and placed the pots in the same growth chamber. Once plants  
227 began flowering, we randomly crossed within and between individuals (total plants: C = 19, T =  
228 19, G = 15). For all crosses, we emasculated the maternal plant 1-3 days prior to each cross to  
229 prevent contamination from self-pollination.

230  
231 To investigate species divergence in effective ploidy, we performed several interspecific,  
232 interploidy crosses: C<sub>4n</sub>xT, TxC<sub>4n</sub>; T<sub>4n</sub>xG, GxT<sub>4n</sub>; C<sub>4n</sub>xG, GxC<sub>4n</sub> (4n subscript indicates  
233 tetraploid). To generate synthetic tetraploid individuals, we treated 100-200 seeds of TWN36 and  
234 LVR1 with 0.1% or 0.2% colchicine and stored them in the dark for 24 hours 16 hours at 23°C  
235 and 8 hours at 16°C. The next day, we planted seeds onto Fafard 4P potting soil using a pipette  
236 and placed pots inside the growth chamber under typical light and temperature conditions (16-h  
237 days at 23°C and 8-h nights at 16°C). Once seeds germinated, we transplanted seedlings into  
238 2.5” pots. After sufficient growth, we prepared samples for flow cytometry using a protocol  
239 adapted from Lu *et al.*, 2017. Briefly, we extracted nuclei from one colchicine-treated sample  
240 and an internal control (2n *Mimulus* or *Arabidopsis thaliana*, Col-0) together in a single well. To  
241 extract nuclei, we chopped 100mg of leaf tissue (50mg colchicine-treated sample and 50 mg  
242 internal control) in 1mL of a pre-chilled lysis buffer (15mM Tris-HCl pH 7.5, 20mM NaCl,  
243 80mM KCl, 0.5mM spermine, 5mM 2-ME, 0.2% TritonX-100). We stained nuclei with 4,6-  
244 Diamidino-2-phenylindole (DAPI), filtered nuclei for debris using a 40um Flowmi™ cell  
245 strainer, and aliquoted nuclei into a single well of a 96-well polypropylene plate. We assessed



246 ploidy of each sample using a CytoFLEX (Beckman Coulter Life Sciences) flow cytometer. We  
247 calculated total DNA content using the following equation:

248

$$249 \quad 2C \text{ DNA content (pg DNA)} = \frac{\text{sample G1 peak mean}}{\text{standard G1 peak mean}} * \text{standard 2C DNA content}$$

250

251 We generated three synthetic polyploids for TWN36 and six for LVR1. For each synthetic  
252 polyploid, 2C DNA content was nearly doubled compared to corresponding diploid lines  
253 (TWN36, 2C = 1.38 pg; TWN36<sub>4n</sub>, 2C = 2.69 ± 0.09 pg; LVR1, 2C = 1.26 pg; LVR1<sub>4n</sub>, 2C =  
254 2.64 ± 0.05 pg). In some cases, we discovered that plants initially identified as tetraploid via  
255 flow cytometry were actually mixoploids. To ensure the crosses we performed were indeed  
256 interploidy, we determined the ploidy of the resulting progeny. From each interploidy cross, we  
257 planted 5-10 seeds per fruit, isolated nuclei from the resulting plants, and assessed 2C content  
258 using a flow cytometer for a few offspring as described above (3n TWN36<sub>4n</sub>xLVR1 = 1.92 ±  
259 0.04, 3n LVR1xTWN36, 2C = 1.88 ± 0.01 pg; 3n LVR1<sub>4n</sub>xDUN10, 2C = 1.95 ± 0.04 pg; 3n  
260 DUN10xLVR1<sub>4n</sub>, 2C = 1.81 ± 0.01 pg). We included data from interploidy crosses only when  
261 their progenies were confirmed to be triploids, or, in the case of 4n *M. caespitosa*, if we were  
262 using a confirmed stable polyploid line (i.e., self-fertilized at least one generation with  
263 polyploidy confirmed in the progeny).

264

265

### 266 ***Measuring seed size and seed viability***

267

268 To measure seed size, we collected three replicate fruits per cross, with each fruit  
269 collected from a distinct plant. We imaged 50 seeds per fruit under a dissecting scope, for a total  
270 of 150 seeds per cross (except for one CxG fruit for which only 35 seeds were measured for a  
271 total of 135 seeds). Seed area was measured using ImageJ (Rasband, 1997).

272

273 Using these same fruits, as well as fruits from interploidy crosses (2-5 fruits/cross, at least  
274 two fruits per cross from a distinct plant), we assessed seed viability using two different  
275 methods. First, we performed visual assessments of mature seeds, looking for irregular

276 phenotypes (shriveled, wrinkled, or flat) known to be associated with hybrid seed inviability in  
277 *Mimulus* (Garner *et al.*, 2016, Oneal *et al.*, 2016, Coughlan *et al.*, 2020, Sandstedt *et al.*, 2021).  
278 We scored the number of seeds that appeared round and plump (*i.e.*, fully-developed) versus  
279 irregularly shaped (*i.e.*, under-developed). Second, we performed Tetrazolium assays to assess  
280 seed viability on a subset of these same seeds (~100 seeds per fruit). For fruits generated from  
281 interploidy crosses and fruits that produced <100 seeds, we stained 32-63 seeds. We immersed  
282 seeds in a scarification solution (83.3% water, 16.6% commercial bleach, and 0.1% Triton X-  
283 100) and placed them on a shaker for 15 minutes. After scarification, we washed seeds five times  
284 with water and incubated seeds with 1% Tetrazolium at 30°C. Two days later, we scored the  
285 number of seeds that stained dark red (viable) versus pink or white (inviable).

286  
287

### 288 ***Seed viability rescues***

289

290 To assess whether aberrant endosperm development contributes to seed defects in  
291 interspecific crosses, we attempted to rescue seed viability with a sucrose-rich medium. We  
292 collected three fruits 8 to 12 days after pollination (DAP) from each intra- and interspecific cross  
293 (not including interploidy crosses), with each fruit collected from a distinct plant. Of the three  
294 fruits per cross, at least one fruit was collected 8 DAP (to maximize the chance of rescue). On  
295 average, we dissected 40 whole immature seeds per fruit (range = 25-57) and placed them on  
296 petri dishes with MS media containing 4% sucrose. We sealed petri dishes with parafilm and  
297 placed them at 23°C with constant light for 14 days before scoring germination.

298  
299

### 300 ***Visualizing parent-of-origin effects during seed development***

301

302 To compare trajectories of seed development, we performed intra- and interspecific  
303 crosses, and we collected fruits 3, 4, 5, 6, 8, and 10 DAP. For consistency, we performed crosses  
304 and collected fruits at the same time of day.

305

306 To visualize early seed development, we collected fruits 3 and 4 DAP ( $N = 1$  to 2 fruits  
307 per DAP per cross) and prepared them for clearing with Hoyer's solution. We placed developing  
308 fruits in a 9 EtOH: 1 acetic acid fixative overnight. The following day, we washed fruits twice in  
309 90% EtOH for 30 min per wash. We dissected immature seeds directly from the fruit onto a  
310 microscope slide with 100uL of 3 parts Hoyer's solution (70% chloral hydrate, 4% glycerol, 5%  
311 gum arabic): 1 part 10% Gum Arabic and sealed the slide with a glass cover slip. We stored the  
312 microscope slides containing cleared, immature seeds at 4°C overnight. The next day, we imaged  
313 slides using the differential interference contrast (DIC) setting with the 20x objective on a Leica  
314 DMRB microscope. For each fruit, we scored the number of developing seeds with and without  
315 an intact chalazal haustorium (15-56 seeds per fruit; 32-111 seeds per cross per DAP); only seeds  
316 with visible embryos were scored. Additionally, we imaged an average of 11 seeds per fruit (3-  
317 15 seeds per fruit, 10-27 seeds per cross per DAP) to assess size differences in the endosperm  
318 and chalazal haustorium at 3 and 4 DAP. For the interploidy  $T_{4n} \times G$  cross, we imaged on average  
319 18 seeds per fruit (14-26 seeds per fruit, 29-40 seeds per cross per DAP). We outlined and  
320 measured the endosperm in all seeds and the chalazal haustorium when present using ImageJ  
321 (Rasband, 1997). Because the chalazal haustorium was not present for all imaged seed, sample  
322 sizes for its measurements were lower. We selected and measured images that represented  
323 typical seed development at each time point.

324  
325 We defined the chalazal haustorium as two uninucleate cells that, together, form a  
326 continuous structure that penetrates toward the ovule hypostase cells (a group of tightly packed  
327 cells at the base of the ovule). To measure the chalazal haustorium, we began the outline near the  
328 epidermis of the seed (not including the hypostase cells) and extending it toward the micropylar  
329 region following Guilford & Fisk, 1952 (see their Figure 27). In addition, when measuring the  
330 endosperm, we started the outline at the same position near the epidermis of the ovule and  
331 extended it toward the opening of the micropylar haustorium.

332  
333 To visualize later seed development (after 4 DAP when the seed coat is too thick to clear  
334 with Hoyer's solution), we collected whole fruits at 5, 6, 8, and 10 DAP and stored them in a  
335 Formaldehyde Alcohol Acetic Acid fixative (10%:50%:5% + 35% water) for a minimum of 48  
336 hours. After fixation, we dehydrated developing fruits with increasing concentrations of Tert

337 Butyl Alcohol. Next, we washed fruits three times for two hours each with paraffin wax at 65°C  
338 before embedding them into a wax block. We sectioned wax blocks containing whole fruits into  
339 ribbons using a LIPSHAW Rotary Microtome (Model 45). Fruits collected at 5 and 6 DAP were  
340 sectioned into 12-um ribbons for better visualization of micropylar and chalazal domains, and  
341 fruits collected at 8 and 12 DAP were sectioned into 8-um ribbons. Next, we gently placed  
342 ribbons in a warm (~40°C) water bath and positioned them onto a microscope slide. We placed  
343 slides on a slide warmer overnight to adhere sections completely to the glass. In a staining series,  
344 we first used Xylene as a clearing agent and performed several washes with increasing  
345 concentrations of EtOH to effectively stain nuclei and cytoplasm (1% Safranin-O and 0.5% Fast  
346 Green, respectively). We further washed stained slides with EtOH and finished the series with  
347 Xylene. We sealed slides with a glass coverslip using Acrytol as the mounting medium.

348

349 We visualized slides using a Zeiss Axioskop 2 microscope with a 10x objective. For each  
350 fruit, we imaged at least 10 seeds with a developing embryo per fruit (except for severe embryo-  
351 lethal crosses: 10 DAP TxG, 8 seeds imaged; 10 DAP CxG, 1 seed imaged). We imaged at least  
352 five consecutive sections of each seed through the embryo. For all seeds imaged at 5 and 6 DAP,  
353 we scored the presence of the chalazal haustorium. Additionally, we categorized embryo  
354 development at 6, 8, and 10 DAP into four different stages: before globular to globular, late-  
355 globular to transition, early-heart to late-heart, and torpedo.

356

### 357 *Data Analysis*

358

359 We performed several statistical analyses to determine the effect of each cross on seed  
360 area, seed viability, germination success on sucrose, and area of the endosperm filled by the  
361 chalazal haustorium. For each seed phenotype, we used the R software package (Bates *et al.*,  
362 2007) to generate a linear model, linear mixed model, or a generalized linear mixed model.  
363 Details of each model are described in Methods S1.

364

365

## 365 RESULTS

366

### 367 *A central role for the endosperm in Mimulus hybrid seed inviability*

368

369 Hybrid seed inviability is an exceptionally strong isolating barrier in crosses between  
370 *Mimulus guttatus*, *M. tilingii*, and *M. caespitosa* (Figs. **1a**, **S1**, Tables **S1**, **S2**). Consistent with  
371 our earlier work (Garner *et al.*, 2016), *M. guttatus* and *M. tilingii* produced almost exclusively  
372 inviable F1 hybrid seeds in both directions of the cross. We found this same result in crosses  
373 between *M. guttatus* and *M. caespitosa*. On the other hand, as we have shown previously  
374 (Sandstedt *et al.*, 2021), F1 hybrid seed inviability between the more closely related *M. tilingii*  
375 and *M. caespitosa* occurs in only one direction of the cross.

376

377 To investigate endosperm involvement in *Mimulus* hybrid seed failure, we attempted to  
378 rescue inviable seeds by plating them on a nutritive, sucrose medium. Even when reciprocal F1  
379 hybrid seeds appear similar in terms of morphology (i.e., flat and shriveled), supplying them with  
380 sucrose revealed clear reciprocal differences in viability (Fig. **1a**, Table **S3**). With *M. guttatus* as  
381 the maternal parent, F1 hybrid seeds from crosses with *M. tilingii* or *M. caespitosa* germinate on  
382 sucrose at rates similar to seeds from parental crosses. In contrast, F1 hybrid seeds with *M.*  
383 *guttatus* as the paternal parent remain almost completely inviable even when supplied with  
384 sucrose. This result might indicate that hybrid seed inviability is independent of the endosperm,  
385 or that the endosperm defect is so severe that embryo development is irreversibly damaged. In  
386 any case, these stark reciprocal differences in F1 hybrid seed inviability – with and without  
387 sucrose – point to a central role for the endosperm in reproductive isolation between these  
388 *Mimulus* species.

389

### 390 ***Divergence in effective ploidy among Mimulus species***

391

392 To investigate differences in effective ploidy among this trio of *Mimulus* species, we  
393 performed a series of interploidy crosses, testing whether artificially doubling the genome  
394 content of one parent could alleviate hybrid seed inviability. Using this approach, we discovered  
395 additional support for endosperm-based barriers and determined the rank order of effective  
396 ploidy among the three *Mimulus* species (Fig. **1b**, Tables **S1**, **S2**). Consistent with *M. caespitosa*  
397 having the lowest effective ploidy, doubling its genome greatly improves hybrid seed viability in  
398 crosses with *M. tilingii* – but only when *M. caespitosa* acts as the seed parent. In the reciprocal

399 direction, which normally produces viable seeds (Fig. 1a), 4n *M. caespitosa* pollen donors  
400 actually induce seed inviability. These results illustrate that divergence in effective ploidy can  
401 cause distinct effects through the two parental genomes: paternal excess from *M. tilingii* is severe  
402 enough to cause seed inviability, whereas maternal excess is sufficiently modest that increasing  
403 paternal dosage from *M. caespitosa* overcompensates for its effects. Along this continuum of  
404 effective ploidy, *M. guttatus* has diverged even further: 4n *M. caespitosa* restores F1 hybrid seed  
405 viability only minimally when it acts as the seed parent in crosses with this species, indicating  
406 severe paternal excess stemming from *M. guttatus*. On the other hand, maternal-excess  
407 inviability from *M. guttatus* is not as debilitating: GxC F1 hybrid seeds are completely rescued  
408 by doubling the genome content of *M. caespitosa*. Among the three species, *M. tilingii* has an  
409 effective ploidy that is intermediate to the other two, with crosses between 4n *M. tilingii* and *M.*  
410 *guttatus* largely or completely restoring hybrid seed inviability. Taken together, these results  
411 demonstrate clear differences in effective ploidy: *M. guttatus* has the highest, *M. tilingii* is  
412 intermediate, and *M. caespitosa* has the lowest (Fig. 1c).

413

#### 414 ***Developmental phenotypes in Mimulus hybrids implicate parental conflict***

415

416 To investigate whether parental conflict is the evolutionary force driving these changes in  
417 effective ploidy, our next step was to take a closer look at parent-of-origin seed phenotypes. As a  
418 first pass, we examined reciprocal differences in F1 hybrid seed size for each species pair,  
419 reasoning that maternal-excess crosses might show signs of undergrowth and paternal-excess  
420 crosses might show signs of overgrowth. Contrary to this expectation, hybrid seeds are almost  
421 always smaller than pure species seeds (except for CxT, which are the same size) and reciprocal  
422 differences are subtle or absent (Fig. S2, Table S4). However, because mature hybrid seed size  
423 depends on a multitude of developmental processes, including embryo growth and early seed  
424 abortion, it might not reflect parent-of-origin phenotypes operating during development.

425

426 Indeed, despite superficial similarities in seed size, we observed dramatic differences in  
427 the underlying development of all reciprocal pairs of F1 hybrid seeds. In early seed development,  
428 we observed overgrowth of the chalazal haustorium in all paternal-excess crosses (CxT, TxG,  
429 CxG in Figs. 2a, S3, S4, Table S5). Whereas during normal seed development (i.e., in the

430 progeny of intraspecific crosses CxC, TxT, and GxG), the chalazal haustorium decreases in size  
431 early (3-4 DAP) and degenerates completely by 5 DAP, it occupies a significantly larger  
432 proportion of the endosperm in paternal-excess crosses and is maintained much longer (Figs. **3**,  
433 **4**, **S3**). In the paternal-excess cross between *M. caespitosa* and *M. tilingii*, the volume of  
434 endosperm devoted to the chalazal haustorium at 4 DAP is nearly twice that of viable seeds  
435 (compare CxT to CxC, TxT, and TxC, Figs. **2a**, **3**, **S3**, Table **S5**) and chalazal structures are  
436 maintained until 6 DAP (Fig. **4**, **S5**). Developmental irregularities in chalazal haustoria are even  
437 clearer in paternal-excess crosses involving *M. guttatus*, the species with the largest effective  
438 ploidy: in TxG and CxG F1 hybrid seeds, the proportion of the endosperm filled by the chalazal  
439 haustorium is ~3-4x greater than in the seeds of reciprocal and intraspecific crosses, and  
440 haustoria persist through 6 DAP (Figs. **2a**, **3**, **4**, **S5**, Table **S5**). Remarkably, this developmental  
441 defect is almost completely rescued by increasing maternal dosage. Indeed, the volume of  
442 endosperm filled by chalazal haustoria is greatly reduced in 4n *M. tilingii* x *M. guttatus* hybrids  
443 (Figs. **2b**, **3**, Table **S5**) and haustoria are almost entirely degenerated by 4 DAP (Fig. **4**).

444  
445 Parent-of-origin effects in the endosperm become even more apparent at later stages of  
446 development. At 6 DAP, the embryo of most pure species seeds is at the globular-to-transition-  
447 stage and is surrounded by a cellularized endosperm with cells that appear largely empty (Figs.  
448 **5a**, **6**, **S5**). By 8 DAP, the centrally-located endosperm cells of these normally developing seeds  
449 begin to break down, while the peripheral endosperm lining the seed coat differentiates into  
450 cytoplasmically dense, starch-filled cells (Figs **5b**, **S5**). However, in maternal-excess crosses,  
451 especially those with *M. guttatus* as the seed parent, these differentiated endosperm cells appear  
452 earlier (6 DAP) and are tightly packed into a much smaller area, leaving little space for embryo  
453 progression. As a result, embryos of seeds from *M. guttatus* maternal-excess crosses fail to  
454 transition from the heart to the torpedo stage (TxG, CxG in Figs. **5**, **6**, **S5**). Paternal-excess  
455 crosses, on the other hand, produce hybrid seeds with delayed endosperm differentiation  
456 accompanied by stymied embryo development (CxT in Figs. **5**, **6**, **S5**). In the most severe  
457 paternal-excess crosses (involving *M. guttatus* as the pollen parent), the endosperm cells of  
458 hybrid seeds fail to differentiate at all and persist as large, empty cells unable to support embryo  
459 development past the globular stage (TxG and CxG in Figs. **5**, **6**, **S5**).

460

461  
462  
463  
464  
465  
466  
467  
468  
469  
470  
471  
472  
473  
474  
475  
476  
477  
478  
479  
480  
481  
482  
483  
484  
485  
486  
487  
488  
489  
490  
491

## DISCUSSION

Identifying the evolutionary drivers of reproductive isolation is a central goal of speciation but remains a formidable challenge, especially for intrinsic postzygotic barriers. Our study provides some of the strongest empirical evidence to date for parental conflict as potent force in the evolution of hybrid seed inviability. Here, we determined that three closely related *Mimulus* species differ in effective ploidy and that crosses between any species pair results in nearly complete reproductive isolation. By performing a detailed time series of normal and F1 hybrid seed development, we uncovered prominent phenotypes with parent-of-origin effects that strongly implicate parental conflict in divergence among *M. caespitosa*, *M. tilingii*, and *M. guttatus*. This study is one of the first to detail the disruption of nutrient acquiring tissues within the endosperm from hybridizations between species of the same ploidy.

Theory predicts parental conflict should specifically target the developmental structures and processes most closely connected to offspring nutrient acquisition (Queller, 1983; Haig & Westoby, 1989). Support for this idea from well-studied systems like *Arabidopsis* and *Capsella* – both with the nuclear mode of endosperm development – has centered around the timing of endosperm cellularization. In maternal-excess crosses, precocious cellularization leads to reduced nuclear proliferation and seed size, whereas in paternal-excess crosses, delayed cellularization results in nuclei over-proliferation and larger seeds (Scott *et al.*, 1998; Pennington *et al.*, 2008; Rebernik *et al.*, 2015; Lafon-Placette *et al.*, 2017; Morgan *et al.*, 2021). Parent-of-origin effects on endosperm development have also been seen in crosses between species with cellular-type endosperms. In *Mimulus* and *Solanum*, maternal-excess crosses seem to develop smaller endosperm cells that are rapidly degraded by the growing embryo, whereas paternal-excess crosses develop fewer, larger endosperm cells that produce bigger seeds (Roth *et al.*, 2018, Coughlan *et al.*, 2020). Together, these studies of endosperm development have begun to build a case for the importance of parental conflict in shaping effective ploidy. Our study builds on these earlier studies by finding a “smoking gun” – that is, a distinct region (i.e., the chalazal haustorium) that seems to be specifically targeted by parental conflict.



492           If there are different potential targets for parental conflict within a seed, why do we argue  
493 for the primacy of the chalazal haustorium? In species across the angiosperm phylogeny, this  
494 specialized region of the endosperm takes on diverse forms but invariably occurs at the maternal-  
495 filial boundary, where it often projects directly into maternal tissues (Povilus & Gehring, 2022).  
496 In *A. thaliana* and cereal crops (both with nuclear-type endosperm development), patterns of  
497 gene expression in chalazal tissues – or in analogous endosperm transfer cells – also point to  
498 their role in nutrient transfer, with upregulation of genes involved in sugar transport and  
499 metabolism (Thiel, 2014, Zhan *et al.*, 2015, Picard *et al.*, 2021). In addition to this direct role in  
500 nutrient acquisition, the *Arabidopsis* chalazal endosperm appears to exert indirect effects on the  
501 process by producing the signaling protein TERMINAL FLOWER1 (TFL1), which moves to the  
502 peripheral endosperm and initiates cellularization (Zhang *et al.*, 2020). Thus, mounting evidence  
503 suggests genes expressed in the chalazal region are critical in determining the amount and timing  
504 of nutrient flow into the developing embryo.

505  
506           Our finding that the chalazal endosperm develops abnormally in inviable, paternal-excess  
507 F1 hybrid *Mimulus* seeds also adds to a growing body of evidence suggesting this tissue is  
508 particularly sensitive to parental dosage and gene imprinting. Under a scenario of parental  
509 conflict in which maternally expressed genes (MEGs) and paternally expressed genes (PEGs)  
510 spar over the distribution of maternally-supplied resources to the developing seeds, the chalazal  
511 endosperm should play a key role (Povilus & Gehring, 2022). In line with this prediction, gene  
512 expression of two major regulators of PEGs in *A. thaliana* – *FIS2* and *MEA* – becomes localized  
513 in the chalazal cyst right at the point of cellularization (Luo *et al.*, 2000). *FIS2* and *MEA* are  
514 themselves MEGs and members of the Polycomb Repressive Complex 2 (PRC2) complex,  
515 which act to epigenetically silence the maternal alleles of PEGs (Kinoshita *et al.*, 1999; Luo *et al.*,  
516 *et al.*, 2000; Köhler *et al.*, 2005). In *fis2* mutants, endosperm cellularization fails, hexose  
517 accumulation in the central vacuole is prolonged (Hehenberger *et al.*, 2012), and the chalazal  
518 endosperm is enlarged (sometimes filling ~50% of the endosperm; Sørensen *et al.*, 2001). This  
519 scenario of an evolutionary arms race between imprinted genes might explain why effective  
520 ploidy is positively correlated with the number and expression of PEGs in the endosperm of  
521 *Capsella* species (Lafon-Placette *et al.*, 2018). Additionally, single nucleus RNA-sequencing in  
522 *Arabidopsis* shows that PEG expression is specifically enriched in the chalazal endosperm

523 (Picard *et al.*, 2021). Together with our study, this evidence points toward parental conflict  
524 driving rapid changes in gene expression within the chalazal endosperm because it is a  
525 particularly effective venue for manipulating the transfer of maternal resources. In further  
526 support of this idea, chalazal-specific genes in two species of *Arabidopsis* show elevated rates of  
527 adaptive evolution compared to genes expressed in other regions of the seed (Geist *et al.*, 2019).

528

529 In addition to the chalazal haustorium, parental conflict might target other tissues in the  
530 developing seed that regulate nutrient transfer to the embryo, including the micropylar region,  
531 which transfers sucrose from the integuments to the embryo (Morley-Smith *et al.*, 2008). We  
532 found that the micropylar haustorium typically degenerates before 10 DAP in intraspecific  
533 *Mimulus* crosses but persists in some paternal-excess crosses. For example, when *M. tilingii* acts  
534 as the seed parent and *M. guttatus* as the pollen parent, the micropylar region appears enlarged in  
535 developing hybrid seeds and is still present at 10 DAP (Fig S4). Similar, though less severe  
536 abnormalities also appear in CxT hybrid seeds, but a more detailed investigation of seed  
537 development in the micropylar region is needed. Intriguingly, disruptions to the micropylar  
538 region have also been reported in paternal-excess, interploidy crosses in *Galeopsis* and  
539 *Arabidopsis* (Håkansson, 1952; Scott *et al.*, 1998), with micropylar haustoria vigorously  
540 invading seed integuments.

541

542 In addition to identifying the chalazal haustorium as a potential target of parental conflict,  
543 our study is one of only a handful to investigate divergence in effective ploidy among multiple,  
544 closely related species pairs. In this trio of *Mimulus* species, we find that effective ploidy is  
545 somewhat related to genetic distance – that is, the most closely related species pair, *M.*  
546 *caespitosa* and *M. tilingii*, has diverged the least in effective ploidy. However, the fact that each  
547 species has evolved to a different level of effective ploidy implies there have been lineage-  
548 specific changes, potentially driven by differences in the strength of parental conflict. The  
549 evolution of a relatively high effective ploidy in *M. guttatus* suggests that parental conflict has  
550 either increased in this species or decreased in the lineage leading to *M. caespitosa* and *M.*  
551 *tilingii*. Additionally, a lower effective ploidy in *M. caespitosa* might suggest this species has  
552 experienced a relaxation in conflict compared to *M. tilingii*. Consistent with this idea, *M.*  
553 *caespitosa* seems to have shifted toward self-fertilization, which theory predicts should decrease

554 the opportunity for parental conflict (Brandvain & Haig, 2005). Although all three *Mimulus*  
555 species are hermaphroditic and self-compatible, *M. caespitosa* has a reduced anther-stigma  
556 distance and often self-fertilizes in the greenhouse (Sandstedt *et al.*, 2021). The strength of  
557 parental conflict within species may also depend on other factors that influence effective  
558 population size (Coughlan *et al.*, 2020, reviewed in Städler *et al.*, 2021). In line with this  
559 expectation, nucleotide diversity in these three *Mimulus* species follows the same rank order as  
560 effective ploidy (Sandstedt *et al.*, 2021). Even with these potentially divergent histories of  
561 conflict, disruption of the chalazal haustorium was observed in the F1 hybrid seeds of all  
562 *Mimulus* species pairs, which might suggest there have been parallel developmental changes  
563 across lineages. Going forward, identifying the genetic basis of these developmental phenotypes  
564 will be an important step toward understanding how and when parental conflict drives speciation.

565

566

567 **Acknowledgments:** We thank Tylanna Baker and Jaylin Knight for help with data collection.  
568 We are grateful to Jill Anderson, Wolfgang Lukowitz, David Hall, Robert Schmitz, Robert  
569 Franks, Alex Sotola, Samuel Mantel, Matthew Farnitano, Makenzie Whitener, Jenn Coughlan,  
570 Elen Oneal, Miguel Flores-Vergara, Jay Sobel, and John Willis for helpful discussions. Robert  
571 Franks, Jenn Coughlan, Alex Sotola, Samuel Mantel, Elen Oneal, and John Willis provided  
572 valuable comments and improved the quality of the manuscript. This work was supported by the  
573 National Institutes of Health T32 Fellowship [GM007103] to G.D.S., the Jan and Kirby Alton  
574 Fellowship [Department of Genetics, UGA] to G.D.S., and National Science Foundation grants  
575 [DEB-1350935 and DEB-1856180] to A.L.S.

576

577 The authors declare no competing interests.

578

579 **Author Contributions:** Research conceived and designed by G.D.S. and A.L.S., data collected  
580 and analyzed by G.D.S., and manuscript written by G.D.S. and A.L.S. G.D.S. and A.L.S.  
581 contributed equally.

582

583 **Data Accessibility:** Data will be made available on Dryad Digital Repository.

584

585

586  
587  
588  
589  
590  
591  
592  
593  
594  
595  
596  
597  
598  
599  
600  
601  
602  
603  
604  
605  
606  
607  
608  
609  
610  
611  
612  
613  
614  
615  
616

## REFERENCES

- Arekal GD. 1965.** Embryology of *Mimulus ringens*. *Botanical Gazette* **126**: 58–66.
- Bates D, Sarkar D, Bates MD, Matrix L. 2007.** The lme4 package. *R package version 2*: 74.
- Batista RA, Köhler C. 2020.** Genomic imprinting in plants-revisiting existing models. *Genes & development* **34**: 24–36.
- Baud S, Wuillème S, Lemoine R, Kronenberger J, Caboche M, Lepiniec L, Rochat C. 2005.** The AtSUC5 sucrose transporter specifically expressed in the endosperm is involved in early seed development in Arabidopsis. *Plant Journal* **43**: 824–836.
- Berger F. 2003.** Endosperm: the crossroad of seed development. *Current opinion in plant biology* **6**: 42–50
- Berger F, Hamamura Y, Ingouff M, Higashiyama T. 2008.** Double fertilization – caught in the act. *Trends in Plant Science* **13**: 437–443.
- Brandvain Y, Haig D. 2005.** Divergent Mating Systems and Parental Conflict as a Barrier to Hybridization in Flowering Plants. *The American Naturalist* **166**: 30–338.
- Brink RA, Cooper DC. 1947.** The Endosperm in Seed Development. *The Botanical Review* **13**: 479–541.
- Brown RC, Lemmon BE, Nguyen H. 2003.** Events during the first four rounds of mitosis establish three developmental domains in the syncytial endosperm of *Arabidopsis thaliana*. *Protoplasma* **222**: 167–174.
- Bushell C, Spielman M, Scott RJ. 2003.** The basis of natural and artificial postzygotic hybridization barriers in *Arabidopsis* species. *Plant Cell* **15**: 1430–1442.

- 617  
618 **Cooper DC, and Brink RA. 1942.** The endosperm as a barrier to interspecific hybridization in  
619 flowering plants. *Science* **95**: 75-76.  
620  
621 **Coughlan JM, Brown MW, Willis JH. 2020.** Patterns of Hybrid Seed Inviability in the  
622 *Mimulus guttatus* sp. Complex Reveal a Potential Role of Parental Conflict in Reproductive  
623 Isolation. *Current Biology* **30**: 83–93.  
624  
625 **Coughlan, JM, Brown MW, and Willis JH. 2021.** The genetic architecture and evolution of  
626 life-history divergence among perennials in the *Mimulus guttatus* species complex. *Proceedings*  
627 *of the Royal Society B.* **288**: p.20210077.  
628  
629 **Dobzhansky T. 1937.** Genetic nature of species differences. *The American Naturalist.* **71**: 404-  
630 420.  
631  
632 **Floyd SK, Friedman WE. 2000.** Evolution of endosperm developmental patterns among basal  
633 flowering plants. *International Journal of Plant Sciences* **161**: S57–S81.  
634  
635 **Garcia D, Saingery V, Chambrier P, Mayer U, Jürgens G, Berger F. 2003.** Arabidopsis  
636 *haiku* mutants reveal new controls of seed size by endosperm. *Plant Physiology* **131**: 1661–1670.  
637  
638 **Garner AG, Kenney AM, Fishman L, Sweigart, AL. 2016.** Genetic loci with parent-of-origin  
639 effects cause hybrid seed lethality in crosses between *Mimulus* species. *New Phytologist* **211**:  
640 319–331.  
641  
642 **Geist KS, Strassmann JE, Queller DC. 2019.** Family quarrels in seeds and rapid adaptive  
643 evolution in Arabidopsis. *Proceedings of the National Academy of Sciences* **116**: 9463-9468  
644  
645 **Guilford VB, Fisk EL. 2016.** Torrey Botanical Society Megasporogenesis and Seed  
646 Development in *Mimulus tigrinus* and *Torenia fournieri*. *Bulletin of the Torrey Botanical Club.*  
647 **79**: 6–24.

- 648
- 649 **Haig D, Westoby M. 1989.** Parent-Specific Gene Expression and the Triploid Endosperm. *The*  
650 *American Naturalist* **134**: 147–155.
- 651
- 652 **Haig D, Westoby M. 1991.** Genomic Imprinting in Endosperm: Its Effect on Seed Development  
653 in Crosses between Species, and between Different Ploidies of the Same Species, and Its  
654 Implications for the Evolution of Apomixis. *Philosophical Transactions: Biological Sciences* 1–  
655 13.
- 656
- 657 **Håkansson A. 1952.** Seed development after 2x, 4x crosses in *Galeopsis pubescens*. *Hereditas*  
658 **38**:425–448.
- 659
- 660 **Hamilton WD. 1964.** The genetical theory of kin selection. *J. Theor. Biol.*, **7**: 1–52.
- 661
- 662 **Hehenberger E, Kradolfer D, Köhler C. 2012.** Endosperm cellularization defines an important  
663 developmental transition for embryo development. *Development* **139**: 2031–2039.
- 664
- 665 **İltaş Ö, Svitok M, Cornille A, Schmickl R, Lafon Placette C. 2021.** Early evolution of  
666 reproductive isolation: A case of weak inbreeder/strong outbreeder leads to an intraspecific  
667 hybridization barrier in *Arabidopsis lyrata*. *Evolution* **75**: 1466–1476.
- 668
- 669 **Johnston SA, den Nijs TPM, Peloquin SJ, Hanneman RE. 1980.** The Significance of Genic  
670 Balance to Endosperm Development in Interspecific Crosses. *Theoretical and applied*  
671 *genetics* **57**: 5–9.
- 672
- 673 **Kang IH, Steffen JG, Portereiko MF, Lloyd A, Drews GN. 2008.** The AGL62 MADS domain  
674 protein regulates cellularization during endosperm development in *Arabidopsis*. *Plant Cell* **20**:  
675 635–647.
- 676
- 677 **Kinoshita T, Yadegari R, Harada JJ, Goldberg RB, and Fischer RL. 1999.** Imprinting of the  
678 MEDEA polycomb gene in the *Arabidopsis* endosperm. *The Plant Cell* **11**: 1945-1952.

679

680 **Kinoshita T. 2007.** Reproductive barrier and genomic imprinting in the endosperm of flowering  
681 plants. *Genes & genetic systems* **82**: 177–186.

682

683 **Kinser TJ, Smith RD, Lawrence AH, Cooley AM, Vallejo-Marín M, Conradi Smith GD,**  
684 **Puzey JR. 2021.** Endosperm-based incompatibilities in hybrid monkeyflowers. *The Plant Cell*  
685 **33**: 2235–2257.

686

687 **Köhler C., Page DR, Gagliardini V, and Grossniklaus U. 2005.** The *Arabidopsis thaliana*  
688 MEDEA Polycomb group protein controls expression of PHERES1 by parental  
689 imprinting. *Nature genetics* **37**: 28-30.

690

691 **Lafon-Placette C, Hatorangan MR, Steige KA, Cornille A, Lascoux M, Slotte T, Köhler C.**  
692 **2018.** Paternally expressed imprinted genes associate with hybridization barriers in *Capsella*.  
693 *Nature Plants* **4**: 352–357.

694

695 **Lafon-Placette C, Johannessen IM, Hornslien KS, Ali MF, Bjerkan KN, Bramsiepe J,**  
696 **Glöckle BM, Rebernic CA, Brysting AK, Grini PE, Köhler C. 2017.** Endosperm-based  
697 hybridization barriers explain the pattern of gene flow between *Arabidopsis lyrata* and  
698 *Arabidopsis arenosa* in Central Europe. *Proceedings of the National Academy of Sciences of the*  
699 *United States of America* **114**: E1027–E1035.

700

701 **Lafon-Placette C, Köhler C. 2016.** Endosperm-based postzygotic hybridization barriers:  
702 developmental mechanisms and evolutionary drivers. *Molecular ecology* **25**: 2620–2629.

703

704 **Lenth R, Lenth MR. 2018.** Package ‘lsmeans’. *The American Statistician*, **34**: 216–221.

705 **Lin B-Y. 1984.** Ploidy barrier to endosperm development in maize. *Genetics* **107**: 103–115.

706

707 **Lu J, Zhang C, Baulcombe DC, Chen ZJ. 2012.** Maternal siRNAs as regulators of parental  
708 genome imbalance and gene expression in endosperm of *Arabidopsis* seeds. *Proceedings of the*  
709 *National Academy of Sciences of the United States of America* **109**: 5529–5534.

710  
711 **Lu Z, Hofmeister BT, Vollmers C, DuBois RM, and Schmitz RJ. 2017.** Combining ATAC-  
712 seq with nuclei sorting for discovery of cis-regulatory regions in plant genomes. *Nucleic acids*  
713 *research*, **45**: 41-41.  
714  
715 **Luo M, Bilodeau P, Dennis ES, Peacock WJ, Chaudhury A. 2000.** Expression and parent-of-  
716 origin effects for FIS2, MEA, and FIE in the endosperm and embryo of developing Arabidopsis  
717 seeds. *Proceedings of the National Academy of Sciences* **97**: 10637–10642.  
718  
719 **Luo M, Dennis ES, Berger F, Peacock WJ, Chaudhury A. 2005.** MINISEED3 (MINI3), a  
720 WRKY family gene, and HAIKU2 (IKU2), a leucine-rich repeat (LRR) KINASE gene, are  
721 regulators of seed size in Arabidopsis. *Proceedings of the National Academy of Sciences* **102**:  
722 17531–17536.  
723  
724 **Mikesell J. 1990.** Anatomy of terminal haustoria in the ovule of plantain (*Plantago major* L.)  
725 with taxonomic comparison to other angiosperm taxa. *Botanical Gazette*, **151**: 452–464.  
726  
727 **Morgan EJ, Čertner M, Lučanová M, Deniz U, Kubíková K, Venon A, Kovářík O, Lafon**  
728 **Placette C, Kolář, F. 2021.** Disentangling the components of triploid block and its fitness  
729 consequences in natural diploid–tetraploid contact zones of *Arabidopsis arenosa*. *New*  
730 *Phytologist* **232**: 449–1462.  
731  
732 **Morley-Smith ER, Pike MJ, Findlay K, Köckenberger W, Hill LM, Smith AM, Rawsthorne**  
733 **S. 2008.** The transport of sugars to developing embryos is not via the bulk endosperm in oilseed  
734 rape seeds. *Plant Physiology* **147**: 2121–2130.  
  
735 **Muller H. J. 1942.** Isolating mechanisms, evolution, and temperature. *Biological Symposium* **6**:  
736 71–125.  
  
737 **Nesom GL. 2012.** Taxonomy of *Erythranthe* sect. *Simiola* (Phrymaceae) in the USA and  
738 Mexico. *Phytoneuron* **40**: 1–123.



- 739 **Nguyen H, Brown RC, Lemmon, BE. 2000.** The specialized chalazal endosperm in  
740 *Arabidopsis thaliana* and *Lepidium virginicum* (Brassicaceae). *Protoplasma*, **212**: 99–110.  
741
- 742 **Nishiyama I, Inomata N. 1966.** Embryological studies on cross-incompatibility between 2x and  
743 4x in Brassica. *The Japanese journal of genetics* **41**: 27–42.  
744
- 745 **Nishiyama I, Yabuno T. 1978.** Causal Relationships between the Polar Nuclei in Double  
746 Fertilization and Interspecific Cross-incompatibility in *Avena*. *Cytologia*, **43**: 453–466.  
747
- 748 **Oneal E, Willis JH, Franks RG. 2016.** Disruption of endosperm development is a major cause  
749 of hybrid seed inviability between *Mimulus guttatus* and *Mimulus nudatus*. *New Phytologist* **210**:  
750 1107–1120.  
751
- 752 **Pennington PD, Costa LM, Gutierrez-Marcos JF, Greenland AJ, Dickinson HG. 2008.**  
753 When genomes collide: Aberrant seed development following maize interploidy crosses. *Annals*  
754 *of botany* **101**: 833–843.  
755
- 756 **Picard CL, Povilus RA, Williams BP, Gehring M. 2021.** Transcriptional and imprinting  
757 complexity in *Arabidopsis* seeds at single-nucleus resolution. *Nature plants* **7**: 730–738.  
758
- 759 **Povilus RA, Gehring M. 2022.** Maternal-filial transfer structures in endosperm: A nexus of  
760 nutritional dynamics and seed development. *Current opinion in plant biology* **65**: 102121.  
761
- 762 **Queller DC. 1983.** Kin Selection and Conflict in Seed Maturation. *Journal of Theoretical*  
763 *Biology* **100**: 153–172.  
764
- 765 **Rasband WS. 1997.** ImageJ, U. S. National Institutes of Health, Bethesda, Maryland, USA,  
766 <https://imagej.nih.gov/ij/>.  
767

- 768 **Rebernik CA, Lafon-Placette C, Hatorangan MR, Slotte T, Köhler C. 2015.** Non-reciprocal  
769 interspecies hybridization barriers in the *Capsella* genus are established in the endosperm. *PLoS*  
770 *genetics* **11**:1005295.
- 771
- 772 **Reik W, Walter J. 2001.** Genomic imprinting: parental influence on the genome. *Nature*  
773 *Reviews Genetics* **2**: 21–32.
- 774
- 775 **Roth M, Florez-Rueda AM, Griesser S, Paris M, Städler T. 2018.** Incidence and  
776 developmental timing of endosperm failure in post-zygotic isolation between wild tomato  
777 lineages. *Annals of Botany* **121**: 107–118.
- 778
- 779 **Sandstedt GD, Wu CA, Sweigart AL. 2021.** Evolution of multiple postzygotic barriers between  
780 species of the *Mimulus tilingii* complex\*. *Evolution* **75**: 600–613.
- 781
- 782 **Scott RJ, Spielman M, Bailey J, Dickinson HG. 1998.** Parent-of-origin effects on seed  
783 development in *Arabidopsis thaliana*. *Development* **125**: 3329–3341.
- 784
- 785 **Sørensen MB, Chaudhury AM, Robert H, Banchare E, Berger F. 2001.** Polycomb group  
786 genes control pattern formation in plant seed. *Current Biology* **11**: 277–281.
- 787
- 788 **Städler T, Florez-Rueda AM, Roth M. 2021.** A revival of effective ploidy: the asymmetry of  
789 parental roles in endosperm-based hybridization barriers. *Current Opinion in Plant Biology* **61**:  
790 102015
- 791
- 792 **Stephens SG. 1949.** The cytogenetics of speciation in *Gossypium*. I. Selective elimination of the  
793 donor parent genotype in interspecific backcrosses. *Genetics* **34**: 627.
- 794
- 795 **Thiel J. 2014.** Development of endosperm transfer cells in barley. *Frontiers in Plant Science* **5**:  
796 108.
- 797

798 **Vickery RK. 1978.** Case studies in the evolution of species complexes in *Mimulus*. *Evolutionary*  
799 *biology* 405–507. Springer, Boston, MA.

800

801 **Woodell SRJ, Valentine DH. 1961.** Studies in British Primulas IX. Seed Incompatibility in  
802 Diploid-Autotetraploid Crosses. *New Phytologist* 282–294.

803

804 **Zhan J, Thakare D, Ma C, Lloyd A, Nixon NM, Arakaki AM, Burnett WJ, Logan KO,**  
805 **Wang D, Wang X, Drews GN. 2015.** RNA sequencing of laser-capture microdissected  
806 compartments of the maize kernel identifies regulatory modules associated with endosperm cell  
807 differentiation. *The Plant Cell*, **27**: 513–531.

808

809 **Zhang B, Li C, Li Y, and Yu, H. 2020.** Mobile TERMINAL FLOWER1 determines seed size  
810 in Arabidopsis. *Nature Plants* **6**: 1146–1157.

811

812

## FIGURE LEGENDS

813

814 **Fig. 1** Percentage of viable seeds from intra- and interspecific crosses among *M. caespitosa* (C),  
815 *M. tilingii* (T), and *M. guttatus* (G). The first letter of each cross indicates the maternal species.  
816 Least squares means (lsmeans) given with +/- SE. Models were generated separately, comparing  
817 reciprocal interspecific crosses and their corresponding intraspecific crosses for any given seed  
818 viability test (*i.e.*, fully-developed seeds scored by eye and seeds germinated on sucrose media).  
819 Note that reciprocal interploidy crosses were included for each model of seed viability scored by  
820 eye. **(a)** Percent seeds per fruit that appeared fully-developed (black bars) and percent seeds  
821 rescued by a sucrose medium (gray bars). **(b)** Percent seeds per fruit that appeared fully-  
822 developed from interspecific intraploidy (black bars) and interploidy (white bars) crosses. The  
823 numbers above the bars indicate interspecific crosses between the same (“2-2”) and different (“4-  
824 2”, “2-4”) ploidy levels with the maternal parent’s ploidy listed first. The letter in the top left  
825 corner of each plot indicates the tetraploid species in the interploidy crosses. **(c)** Simplified  
826 phylogenetic tree (modified from Sandstedt *et al.* 2021) with effective ploidy relationships  
827 among the three species: *M. caespitosa* is the lowest, *M. tilingii* is intermediate, and *M. guttatus*  
828 is the highest.

829

830 **Fig. 2** Developing seeds four days after pollination (DAP) in crosses among *M. caespitosa* (C),  
831 *M. tilingii* (T), and *M. guttatus* (G). Developing seeds were cleared with Hoyer's solution.

832 Structures were outlined and artificially shaded: blue shading represents embryo, orange shading  
833 represents endosperm region, and purple shading represents chalazal haustorium. Scale bar is

834 0.1mm. **(a)** Seeds 4 DAP of intra- and interspecific crosses. Maternal parent is listed along the  
835 left side, and paternal parent is listed along the top. Along the diagonal are the intraspecific

836 crosses (CxT, TxT, and GxG), below diagonal are maternal-excess crosses (CxT, GxT, and  
837 GxC), and above diagonal are paternal-excess crosses (CxT, TxG, and CxG). **(b)** Representative

838 seed of interploidy cross at 4 DAP. In the bottom left corner, "4-2" represents that the cross was  
839 between two ploidy levels, with the tetraploid maternal parent ploidy listed first. In addition, the

840 "4n" subscript in  $T_{4n} \times G$  indicates that the maternal *M. tilingii* parent is a synthetic tetraploid.

841

842 **Fig. 3** Proportion of endosperm filled by a chalazal haustorium at 3 and 4 days after pollination  
843 in intra- and interspecific crosses among *M. caespitosa* (C), *M. tilingii* (T), and *M. guttatus* (G).

844 The first letter of each cross indicates the maternal species. In the  $T_{4n} \times G$  cross, "4n" subscript  
845 indicates a synthetic tetraploid *M. tilingii* maternal parent. Further, "4-2" denotes that the cross

846 was performed between two ploidy levels – tetraploid maternal parent and diploid paternal  
847 parent. Different letters above boxes indicate significant differences in least squares means

848 among crosses ( $P < 0.05$ ) determined by a post hoc Tukey method. Analyses were performed

849 separately, comparing reciprocal interspecific and corresponding intraspecific crosses, except for  
850 crosses between *M. tilingii* and *M. guttatus* that include comparisons with the  $T_{4n} \times G$  cross.

851

852 **Fig. 4** Proportion of developing seeds with a chalazal haustorium (3, 4, 5, and 6 days after  
853 pollination) from intra- and interspecific crosses among *M. caespitosa* (C), *M. tilingii* (T), and *M.*

854 *guttatus* (G). Numbers in bars represent the total number of developing seeds scored for a  
855 chalazal haustorium, with seeds dissected from 1-2 fruits per cross type per DAP. Seeds were

856 only scored and imaged if they contained a visible embryo. The blue color represents the

857 proportion of seeds with a chalazal haustorium, and the purple color represents the proportion of  
858 seeds without a chalazal haustorium. At days 3 and 4, chalazal haustorium presence/absence was

859 scored after dissecting developing seeds from whole ovules and clearing them with Hoyer's

860 solution. At days 5 and 6, this phenotype was scored from whole fruit, histological sections. **(a)**  
861 Along the diagonal are the intraspecific crosses (CxC, TxT, and GxG), below diagonal are  
862 maternal-excess crosses (CxT, GxT, and GxC; maternal parent always listed first), and above  
863 diagonal are paternal-excess crosses (CxT, TxG, and CxG). **(b)** In the  $T_{4n}XG$  cross type, “4n”  
864 subscript denotes synthetic tetraploid *M. tilingii* maternal parent. The “4-2” above the bars  
865 further represents the cross between two ploidy levels, with a tetraploid maternal parent and  
866 diploid paternal parent.

867  
868 **Fig. 5** Histological sections of whole fruits from intra- and interspecific crosses among *M.*  
869 *caespitosa* (C), *M. tilingii* (T), and *M. guttatus* (G). Maternal parent is listed along the left side,  
870 and paternal parent is listed along the top. Along the diagonal are the intraspecific crosses (CxC,  
871 TxT, and GxG), below diagonal are maternal-excess crosses (CxT, GxT, and GxC; maternal  
872 parent always listed first), and above diagonal are paternal-excess crosses (CxT, TxG, and CxG).  
873 Arrowhead = embryo, en = endosperm, sc = seed coat. Scale bar is 0.1mm. **(a)** 6 DAP.  
874 Intraspecific and paternal-excess endosperms are mostly composed of large empty cells, whereas  
875 maternal-excess crosses (especially GxT and GxC) develop endosperms that are small and  
876 composed of darkly stained, dense cells. **(b)** 8 DAP. Intraspecific endosperm cells begin to  
877 differentiate into cytoplasmically dense, starch-filled cells along the peripheral region near the  
878 seed coat. However, in GxT and GxC crosses, the whole endosperm is composed of these dense  
879 cell types, and the endosperm remains very small and compact. Paternal-excess endosperms  
880 appear abnormal and do not show evidence of cell differentiation by 8 DAP.

881  
882 **Fig. 6** Proportion of embryos at a particular developmental stage at different time points (6, 8, 10  
883 DAP) in intra- and interspecific crosses among *M. caespitosa* (C), *M. tilingii* (T), and *M.*  
884 *guttatus* (G). Numbers in bars represent the total number of embryos scored per cross type,  
885 where less than 10 embryo suggests severe embryo lethality for a particular cross type. Colors in  
886 each bar represents stage of embryo development: lighter purple color represents early to  
887 globular embryos, the darker purple color represents late globular to transition embryos, the  
888 lighter blue color represents early to late heart stage embryos, and the darker blue color  
889 represents torpedo embryos. Stages of embryo development determined from whole fruit  
890 histological sections. Along the diagonal are the intraspecific crosses (CxC, TxT, and GxG),

891 below diagonal are maternal-excess crosses (CxT, GxT, and GxC; maternal parent always listed  
892 first), and above diagonal are paternal-excess crosses (CxT, TxG, and CxG).

893

## 894 SUPPORTING INFORMATION

895

### 896 **Methods S1** Data analysis

897

898 **Table S1** The effect of intra- and interspecific crosses among *M. caespitosa* (C), *M. minor* (M),  
899 and *M. tilingii* (T) on the number of fully-developed seeds per fruit (scored by eye) as  
900 determined by generalized linear mixed models.

901

902 **Table S2** The effect of intra- and interspecific crosses among *M. caespitosa* (C), *M. minor* (M),  
903 and *M. tilingii* (T) on the number of seeds stained dark red by tetrazolium (*i.e.*, viable seeds) as  
904 determined by generalized linear mixed models.

905

906 **Table S3** The effect of intra- and interspecific crosses among *M. caespitosa* (C), *M. minor* (M),  
907 and *M. tilingii* (T) on germination success using sucrose rich media as determined by generalized  
908 linear mixed models.

909

910 **Table S4** The effect of intra- and interspecific crosses among *M. caespitosa* (C), *M. minor* (M),  
911 and *M. tilingii* (T) on seed area as determined by linear mixed models.

912

913 **Table S5:** The effect of intra- and interspecific crosses among *M. caespitosa* (C), *M. minor* (M),  
914 and *M. tilingii* (T), days after pollination (DAP), and their interaction on the area of the  
915 endosperm filled by a chalazal haustorium as determined by linear models.

916

917 **Fig. S1** Tetrazolium assay for seed viability of intra-, interspecific, and interploidy crosses  
918 among *M. caespitosa* (C), *M. tilingii* (T), and *M. guttatus* (G).

919

920 **Fig. S2** Total seed area from crosses within and between *M. caespitosa* (C), *M. tilingii* (T), and  
921 *M. guttatus* (G).

922

923 **Fig. S3** Developing seeds 3 and 4 days after pollination (DAP) in crosses among *M. caespitosa*  
924 (C), *M. tilingii* (T), and *M. guttatus* (G).

925

926 **Fig. S4** Replicate of Figure S3.3 without outlined structures.

927

928 **Fig. S5** Histological sections of whole fruits from intra- and interspecific crosses among *M.*  
929 *caespitosa* (C), *M. tilingii* (T), and *M. guttatus* (G) at 5, 6, 8, and 10 days after pollination  
930 (DAP).

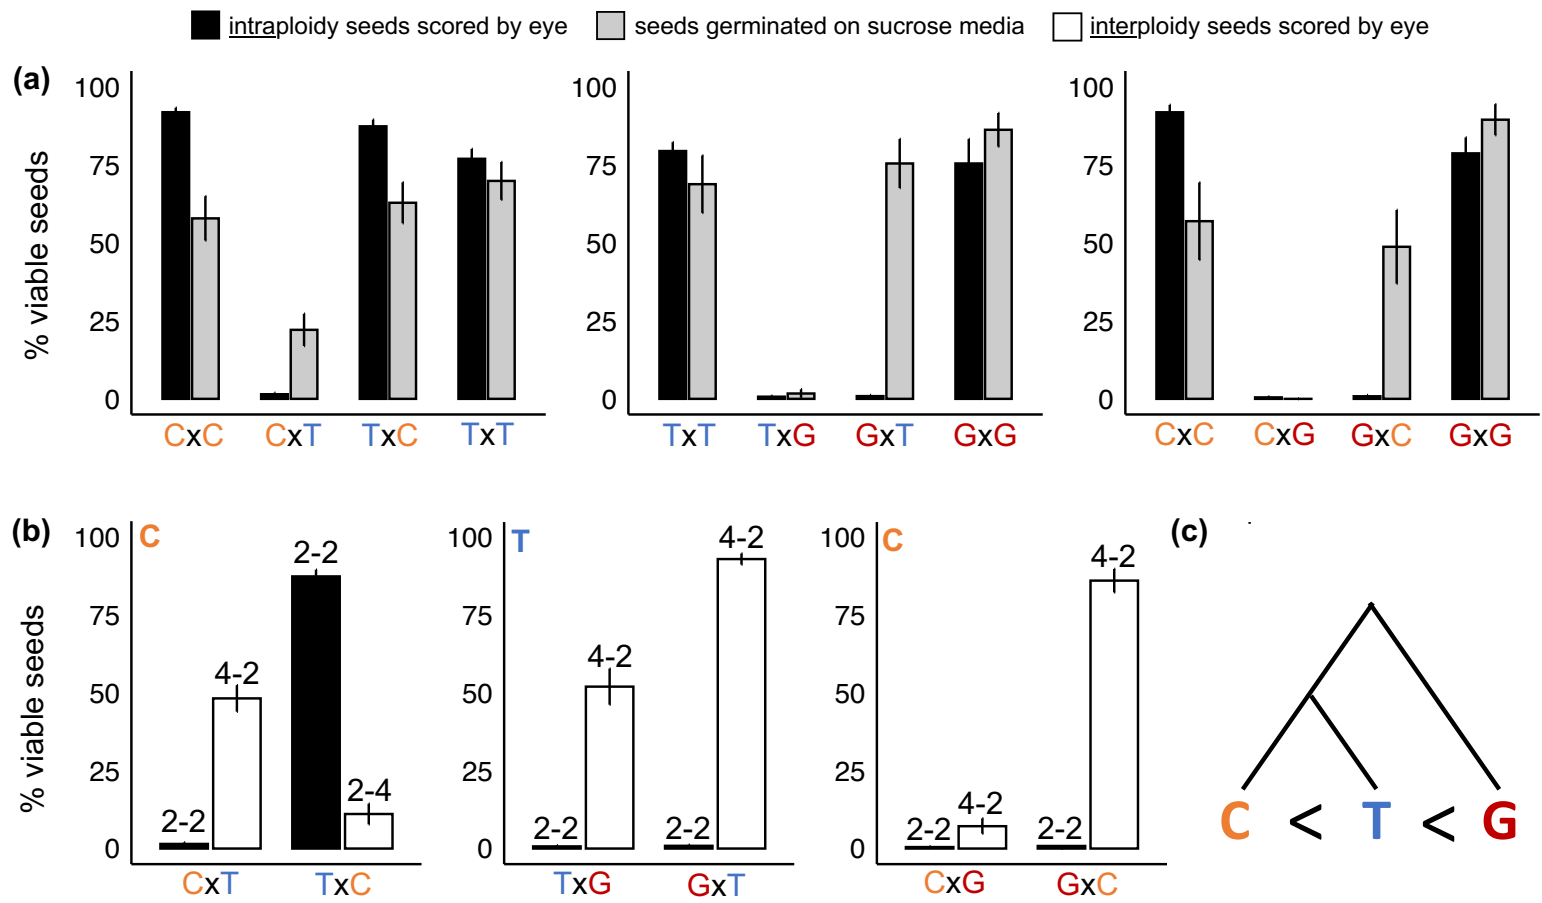

Fig. 1



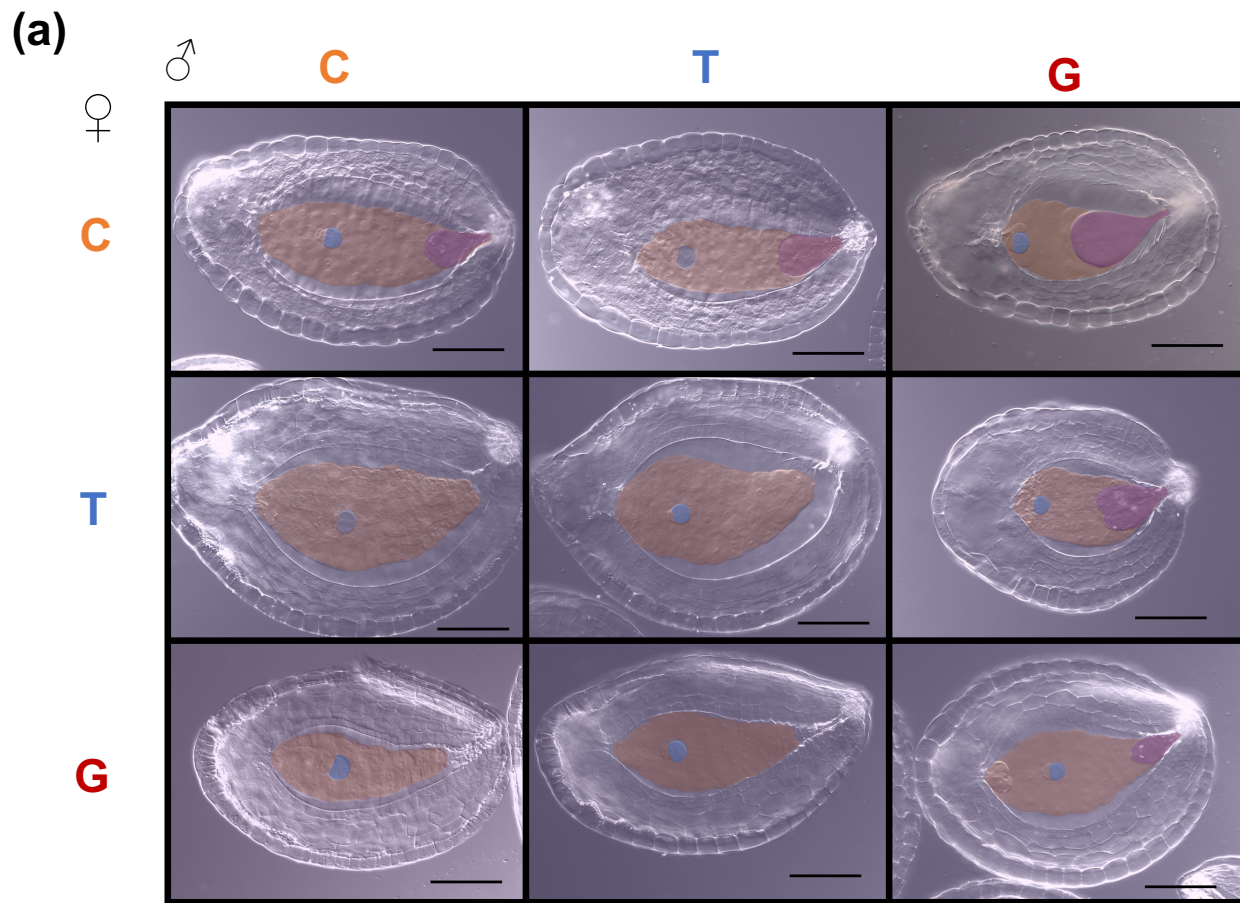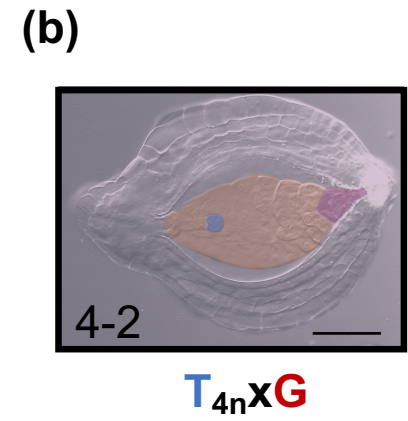

Fig. 2

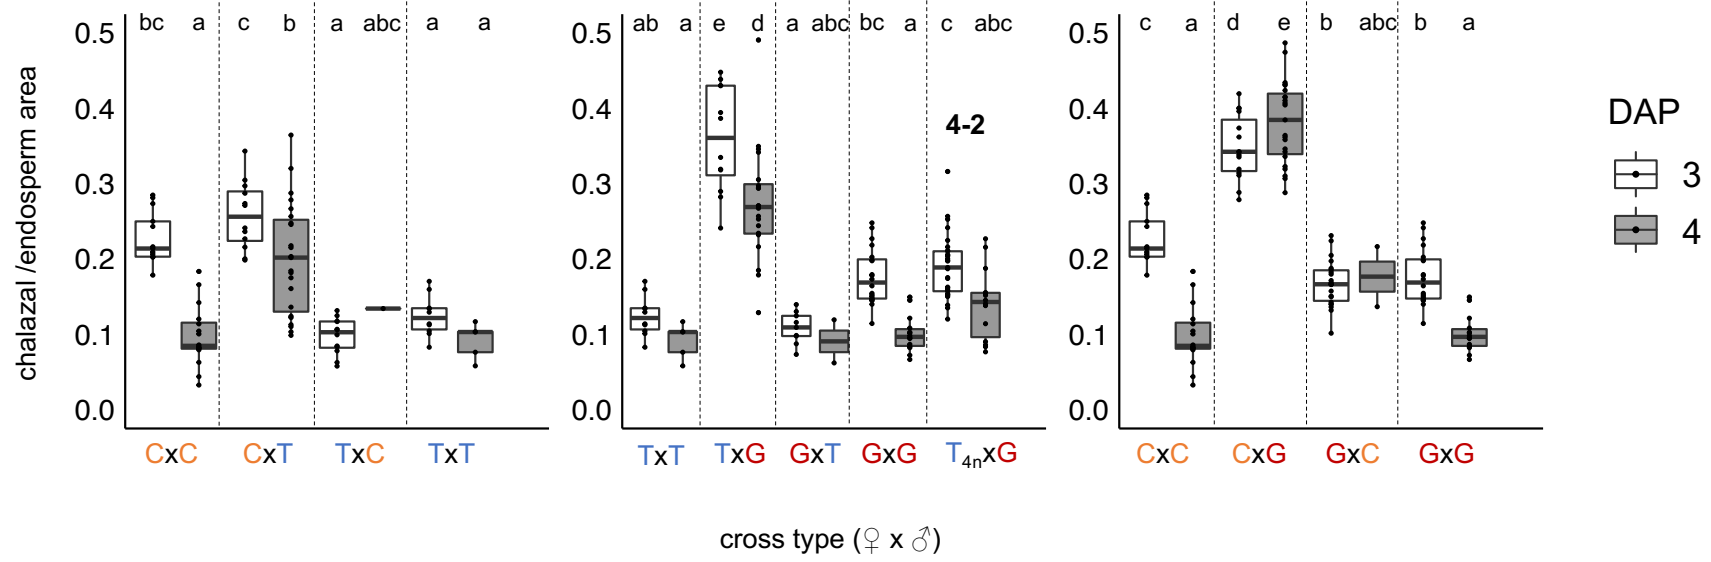

Fig. 3

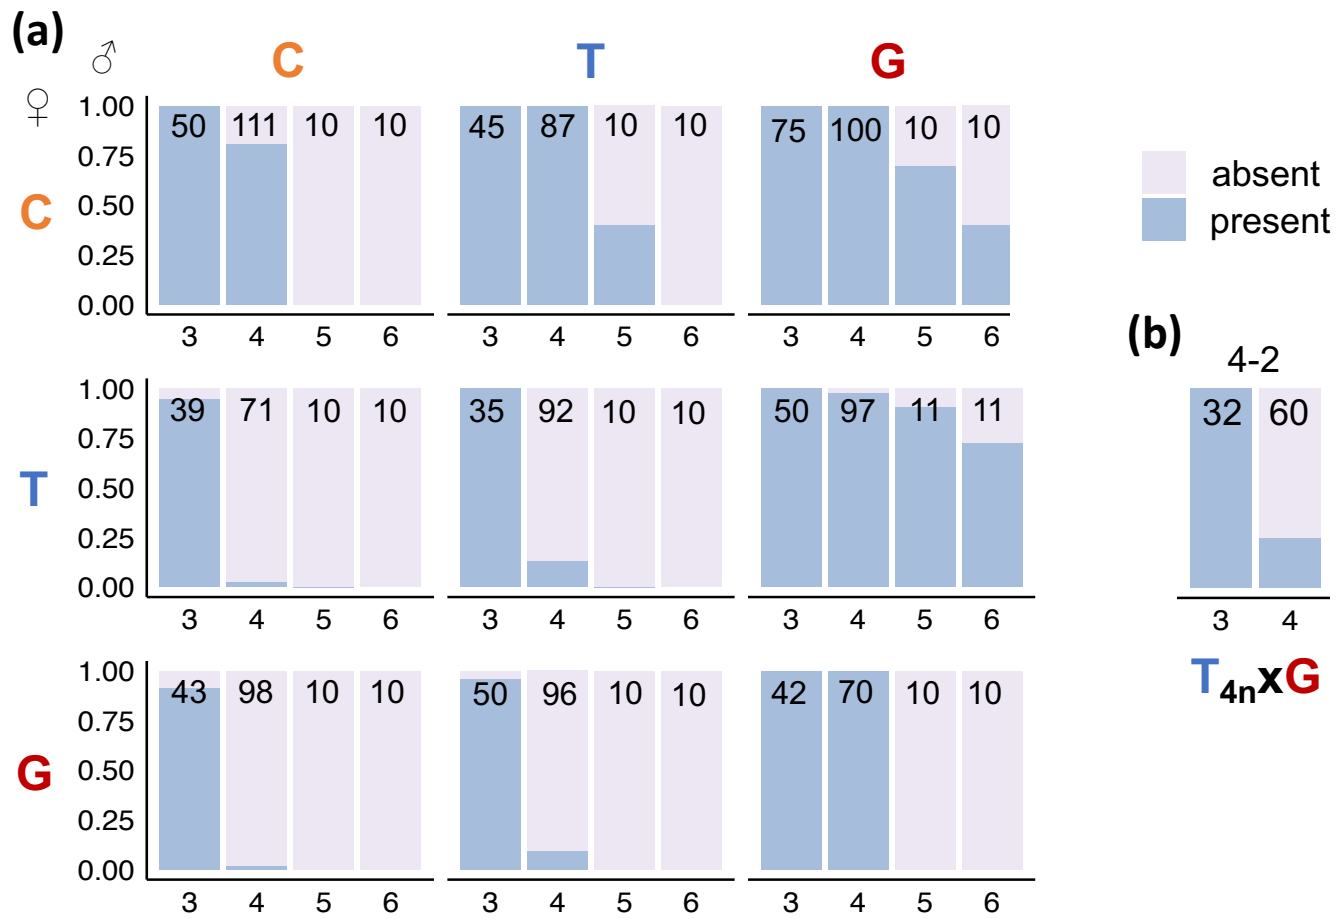

Fig. 4

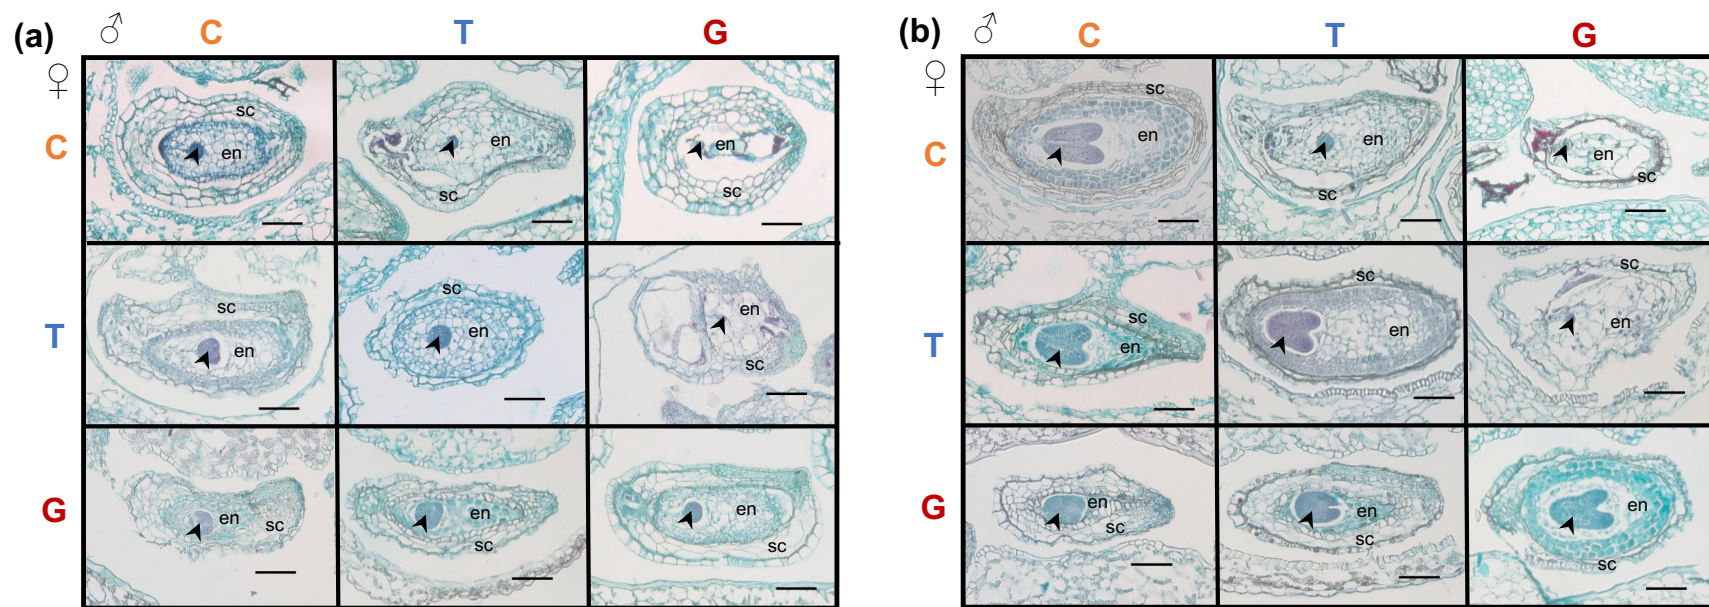

Fig. 5

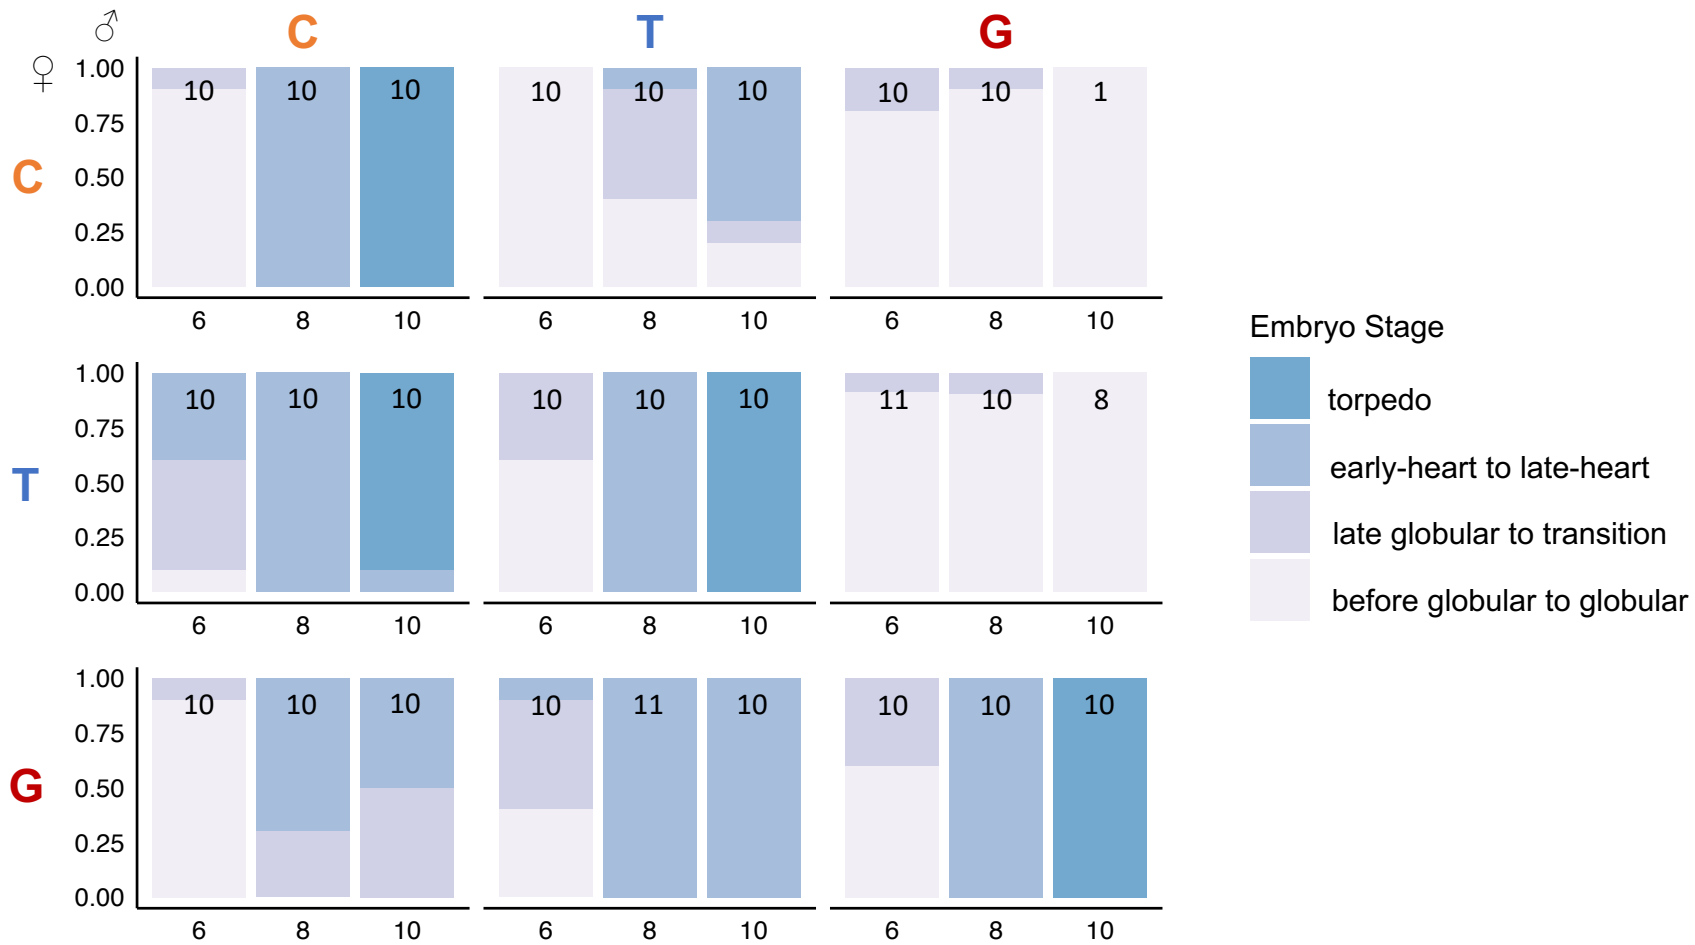

Fig. 6
